# Supplementary material for: Status of alternative angiogenic pathways in glioblastoma resected under and after bevacizumab treatment
Source: PubMed Central journal article supplement (PMC11052834; doi:10.1007/s10014-024-00481-0), 2024-04-15
Supplement: 10014_2024_481_MOESM1_ESM.pdf [file 10014_2024_481_MOESM1_ESM.pdf]

Supplementary Information

article title: Status of alternative angiogenic pathways in glioblastoma resected under and after bevacizumab treatment

journal name: Brain Tumor Pathology

author names: Taketo Ezaki

affiliation and e-mail address of the corresponding author:

Toshihide Tanaka, MD, PhD

Department of Neurosurgery, Jikei University School of Medicine

3-25-8 Nishi-Shinbashi, Minato-ku, Tokyo 105-8461, Japan

TEL: +81-3-3433-1111 (ext. 3461); FAX: +81-3-3459-6412

E-mail: [ttanaka@jikei.ac.jp](mailto:ttanaka@jikei.ac.jp)

Supplement Table 1

Characteristics of patients stratified by responsiveness of Bev

| Characteristic                                              | timing for obtaining of samples during Bev therapy |                                        |                       |
|-------------------------------------------------------------|----------------------------------------------------|----------------------------------------|-----------------------|
|                                                             | naïve Bev (n=25)                                   | effective Bev (n=15)                   | refractory Bev (n=14) |
| Age: Median (years old) [range],yr                          | 55 [29-79]                                         | 68 [48-80]                             | 52 [29-77]            |
| Male (n)                                                    | 18                                                 | 9                                      | 8                     |
| Female (n)                                                  | 7                                                  | 6                                      | 6                     |
| no. cycles of neo-adjuvant Bev                              | 0                                                  | 1 Time, 11<br>2 Times, 1<br>3 Times, 3 |                       |
| Interval between last Bev to surgery/autopsy (days) [range] |                                                    | 23 [15-51]                             | 33 [5-208]            |
| no. cycles of Bev: median [range]                           | 3 [1-24]                                           | 9 [0-28]                               |                       |
| no. cycles of TMZ: median [range]                           | 12 [1-28]                                          | 8 [1-24]                               |                       |
| <i>IDH-1</i> wild status: (n)                               | 23                                                 | 14                                     |                       |
| Methylation status of promoter region of <i>MGMT</i> (n)    | 6                                                  | 2                                      |                       |
| <b>MRI pattern of recurrence</b>                            |                                                    |                                        |                       |
| cT1-Flare up (n)                                            | 6                                                  | 8                                      |                       |
| T2 diffuse / T2 circumscribed (n)                           | 10                                                 | 6                                      |                       |
| non-responder (n)                                           | 4                                                  | 0                                      |                       |

no: Number

Bev: Bevacizumab

TMZ: Temozolomide

*IDH*: isocitrate dehydrogenase

*MGMT*: O6-methylguanine-DNA methyltransferase

Supplement Table2

Characteristics of genetic status, content of chemotherapy, and number of angiogenic factors positive cells

|                      | Case          | age/sex | genetic status |             | no. cycles of Bev/TMZ          |                   |                   | MRI pattern of recurrence | number of angiogenic factors positive cell in tumor vessels |        |      |          |      |
|----------------------|---------------|---------|----------------|-------------|--------------------------------|-------------------|-------------------|---------------------------|-------------------------------------------------------------|--------|------|----------|------|
|                      |               |         | IDH-1 status   | MGMT status | no. cycles of neo-adjutant Bev | no. cycles of Bev | no. cycles of TMZ |                           | ANGPT1                                                      | ANGPT2 | FGF2 | EFNA2    | PLGF |
| <b>Naïve Bev</b>     | N1<br>N1-Rs   | 29/F    | WT             | N/A         |                                | 19                | 3                 | non-responder             | 3                                                           | 0      | 0    | 2        | 0    |
|                      | N2<br>N2-Rs   | 67/M    | WT             | N/A         |                                | 21                | 19                | T2 circumscribed          | 0                                                           | 0      | 0    | 6        | 11   |
|                      | N3<br>N3-Rs   | 51/F    | WT             | N/A         |                                | 18                | 16                | cT1 flare-up              | 1                                                           | 0      | 0    | 0        | 0    |
|                      | N4<br>N4-Rs   | 50/F    | WT             | N/A         |                                | 14                | 20                | non-responder             | 13                                                          | 16     | 14   | 0        | 8    |
|                      | N5<br>N5-Rs   | 52/F    | WT             | N/A         |                                | 9                 | 16                | T2 diffuse                | 8                                                           | 30     | 0    | 0        | 0    |
|                      | N6<br>N6-Rs   | 73/M    | WT             | N/A         |                                | 13                | 26                | T2 diffuse                | 0                                                           | 12     | 6    | 5        | 0    |
|                      | N7<br>N7-Rs   | 52/M    | WT             | N/A         |                                | 20                | 41                | T2 diffuse                | 3                                                           | 28     | 35   | 0        | 8    |
|                      | N8<br>N8-Rs   | 33/F    | WT             | N/A         |                                | 27                | 4                 | non-responder             | 0                                                           | 8      | 0    | 5        | 10   |
|                      | N9<br>N9-Rs   | 41/M    | WT             | N/A         |                                | 26                | 26                | T2 diffuse                | 4                                                           | 21     | 21   | 1        | 4    |
|                      | N10<br>N10-Rs | 51/M    | WT             | N/A         |                                | 9                 | 15                | T2 circumscribed          | 0                                                           | 0      | 5    | 6        | 0    |
|                      | N11<br>N11-Rs | 56/M    | WT             | N/A         |                                | 28                | 21                | cT1 flare-up              | 3                                                           | 18     | 6    | 0        | 0    |
|                      | N12           | 36/M    | R132H mut      | Met         |                                | 0                 | 7                 | non-responder             | 0                                                           | 2      | 0    | 0        | 0    |
|                      | N13           | 51/M    | WT             | Met         |                                | 2                 | 2                 | N/A                       | 0                                                           | 0      | 4    | 0        | 5    |
|                      | N14           | 77/M    | WT             | Met         |                                | 3                 | 13                | N/A                       | 5                                                           | 0      | 33   | 0        | 0    |
|                      | N15           | 44/M    | WT             | Unmet       |                                | 19                | 6                 | T2 circumscribed          | 8                                                           | 7      | 6    | 0        | 0    |
|                      | N16           | 72/M    | WT             | Unmet       |                                | 0                 | 11                | cT1 flare-up              | 10                                                          | 12     | 7    | 6        | 5    |
|                      | N17           | 57/M    | WT             | Met         |                                | 0                 | 0                 | cT1 flare-up              | 0                                                           | 18     | 6    | 0        | 9    |
|                      | N18           | 64/F    | WT             | Unmet       |                                | 0                 | 11                | cT1 flare-up              | 1                                                           | 0      | 0    | 0        | 0    |
|                      | N19           | 55/M    | WT             | Unmet       |                                | N/A               | 14                | T2 diffuse                | 10                                                          | 8      | 44   | 2        | 0    |
|                      | N20           | 66/M    | WT             | Unmet       |                                | 0                 | 5                 | T2 circumscribed          | 6                                                           | 7      | 8    | 20       | 6    |
|                      | N21           | 79/M    | WT             | Met         |                                | 0                 | 12                | N/A                       | 6                                                           | 7      | 21   | 0        | 0    |
|                      | N22           | 59/M    | WT             | Unmet       |                                | 0                 | 1                 | cT1 flare-up              | 0                                                           | 0      | 2    | 4        | 0    |
|                      | N23           | 48/M    | WT             | Unmet       |                                | 11                | 11                | N/A                       | 0                                                           | 7      | 2    | 0        | 0    |
|                      | N24           | 56/M    | WT             | Met         |                                | 0                 | 6                 | N/A                       | 8                                                           | 10     | 22   | 20       | 0    |
|                      | N25           | 71/F    | WT             | Unmet       |                                | 0                 | 14                | N/A                       | 4                                                           | 6      | 0    | 0        | 0    |
|                      | Case          | age/sex | genetic status |             | no. cycles of Bev/TMZ          |                   |                   | MRI pattern of recurrence | number of angiogenic factors positive cell in tumor vessels |        |      |          |      |
|                      |               |         | IDH-1 status   | MGMT status | no. cycles of neo-adjutant Bev | no. cycles of Bev | no. cycles of TMZ |                           | Ang1                                                        | Ang2   | bFGF | EphrinA2 | PIGF |
| <b>Effective Bev</b> | E1            | 48/M    | R132H mut      | Met         | 3                              | 3                 | 3                 | cT1 flare-up              | 1                                                           | 7      | 0    | 12       | 0    |
|                      | E2<br>E2-Rs   | 51/M    | WT             | Unmet       | 2                              | 2                 | 2                 | cT1 flare-up              | 0                                                           | 11     | 9    | 9        | 21   |
|                      | E3<br>E3-Rs   | 55/M    | WT             | N/A         | 1                              | 18                | 38                | T2 diffuse                | 8                                                           | 20     | 14   | 10       | 4    |
|                      | E4            | 68/M    | WT             | N/A         | 1                              | 1                 | 0                 | T2 diffuse                | 6                                                           | 22     | 12   | 15       | 8    |
|                      | E5<br>E5-Rs   | 77/F    | WT             | N/A         | 1                              | 9                 | 17                | T2 circumscribed          | 0                                                           | 0      | 6    | 11       | 18   |
|                      | E6            | 68/M    | WT             | N/A         | 1                              | 24                | 35                | cT1 flare-up              | 0                                                           | 30     | 40   | 5        | 48   |
|                      | E7            | 53/F    | WT             | N/A         | 1                              | 9                 | 24                | T2 diffuse                | 0                                                           | 0      | 6    | 11       | 18   |
|                      | E8            | 72/M    | WT             | N/A         | 1                              | 2                 | 4                 | cT1 flare-up              | 2                                                           | 6      | 5    | 0        | 0    |
|                      | E9            | 72/M    | WT             | N/A         | 1                              | 1                 | 1                 | cT1 flare-up              | 7                                                           | 26     | 3    | 4        | 53   |
|                      | E10           | 61/F    | WT             | Met         | 3                              | 3                 | 3                 | cT1 flare-up              | 0                                                           | 0      | 0    | 7        | 5    |
|                      | E11           | 76/F    | WT             | Unmet       | 3                              | 3                 | 3                 | cT1 flare-up              | 0                                                           | 9      | 7    | 0        | 27   |
|                      | E12           | 80/F    | WT             | N/A         | 1                              | 8                 | 24                | T2 diffuse                | 0                                                           | 16     | 25   | 0        | 3    |
|                      | E13           | 58/F    | WT             | Unmet       | 1                              | 3                 | 8                 | cT1-flare-up              | 2                                                           | 10     | 0    | 6        | 0    |
|                      | E14           | 69/M    | WT             | Unmet       | 1                              | 12                | 8                 | cT1 flare-up              | 3                                                           | 9      | 42   | 3        | 4    |
|                      | E15           | 50/M    | WT             | N/A         | 1                              | 8                 | 12                | cT1 flare-up              | 3                                                           | 8      | 17   | 8        | 0    |

ANGPT; angiopoietin, Bev; bevacizumab, E; effective Bev, EFNA2; Ephrin A2, F; female, FGF2; basic fibroblast growth factor., IDH; isocitrate dehydrogenase, M; male, Met; Methylation of promoter region of MGMT, MGMT; methyl guanine methyltransferase, N; naïve Bev, N/A; not analyzed, PLGF; placenta growth factor, Ra; sample in refractory Bev obtained from autopsy, Rs; sample in refractory Bev obtained from salvage surgery, TMZ; temozolomide, Unmet; Unmethylation of promoter region of MGMT, WT; wild type
